# Supplementary material for: Synthesis and characterization of hole-transporting star-shaped carbazolyl truxene derivatives
Source: Royal Society of Chemistry journal article supplement (doi:10.1039/c5ra12011j), 2015-01-01
Supplement: c5ra12011j1.pdf [file c5ra12011j1.pdf]

## Electronic Supporting Information

### Synthesis and Characterization of Hole-transporting Star-Shaped Carbazolyl Truxene Derivatives

Danusorn Raksasorn<sup>1</sup>, Supawadee Namuangruk<sup>2</sup>, Narid Prachumrak<sup>3</sup>, Taweesak Sudyoadsuk<sup>3</sup>, Vinich Promarak<sup>3</sup>, Mongkol Sukwattanasinitt<sup>1</sup>, Paitoon Rashatasakhon<sup>1\*</sup>

<sup>1</sup>*Department of Chemistry, Faculty of Science, Chulalongkorn University, Bangkok 10330, Thailand*

<sup>2</sup>*National Nanotechnology Center, NSTDA, 111 Thailand Science Park, Klong Luang, Pathum Thani 12120, Thailand*

<sup>3</sup>*Department of Materials Science & Engineering, School of Molecular Science & Engineering, Vidyasirimedhi Institute of Science and Technology, Wongchan, Rayong 21210, Thailand*

E-mail: paitoon.r@chula.ac.th

Tel.: +66 (2) 2187633

Fax.: +66 (2) 2187598

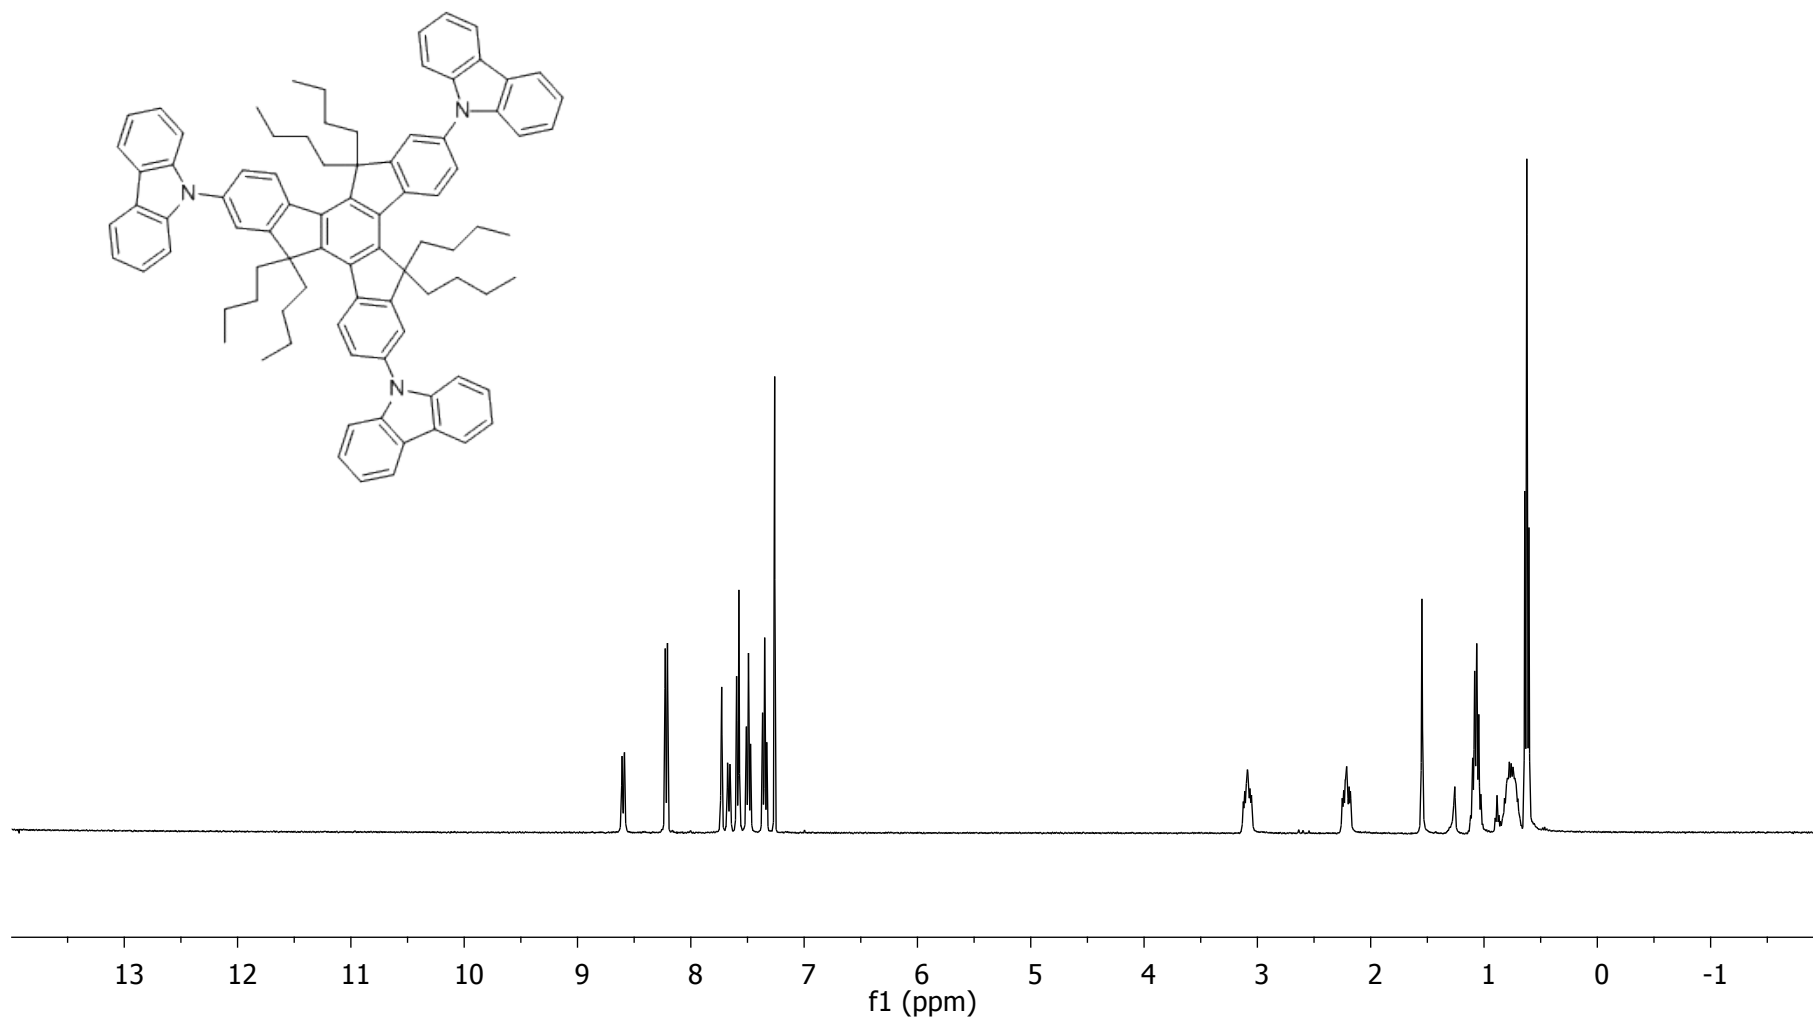

**Figure S1** <sup>1</sup>H-NMR spectrum of **1** in CDCl<sub>3</sub>

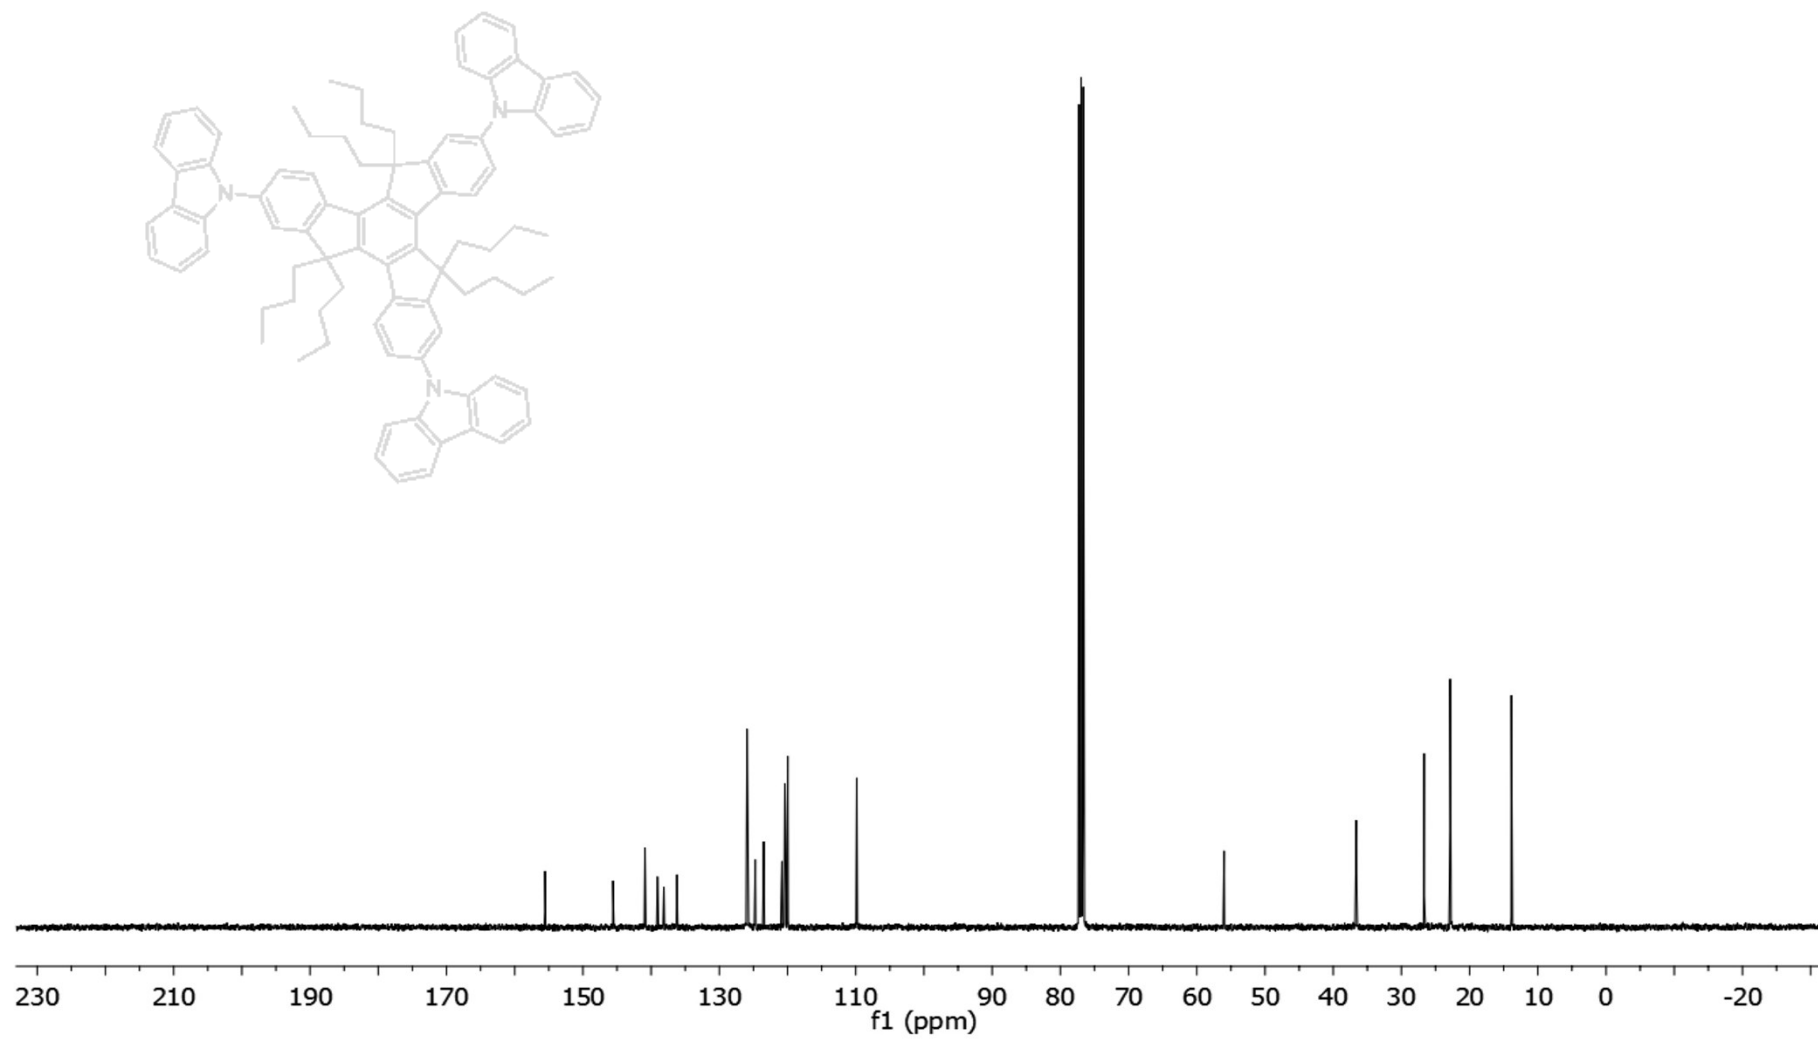

**Figure S2**  $^{13}\text{C}$ -NMR spectrum of **1** in  $\text{CDCl}_3$

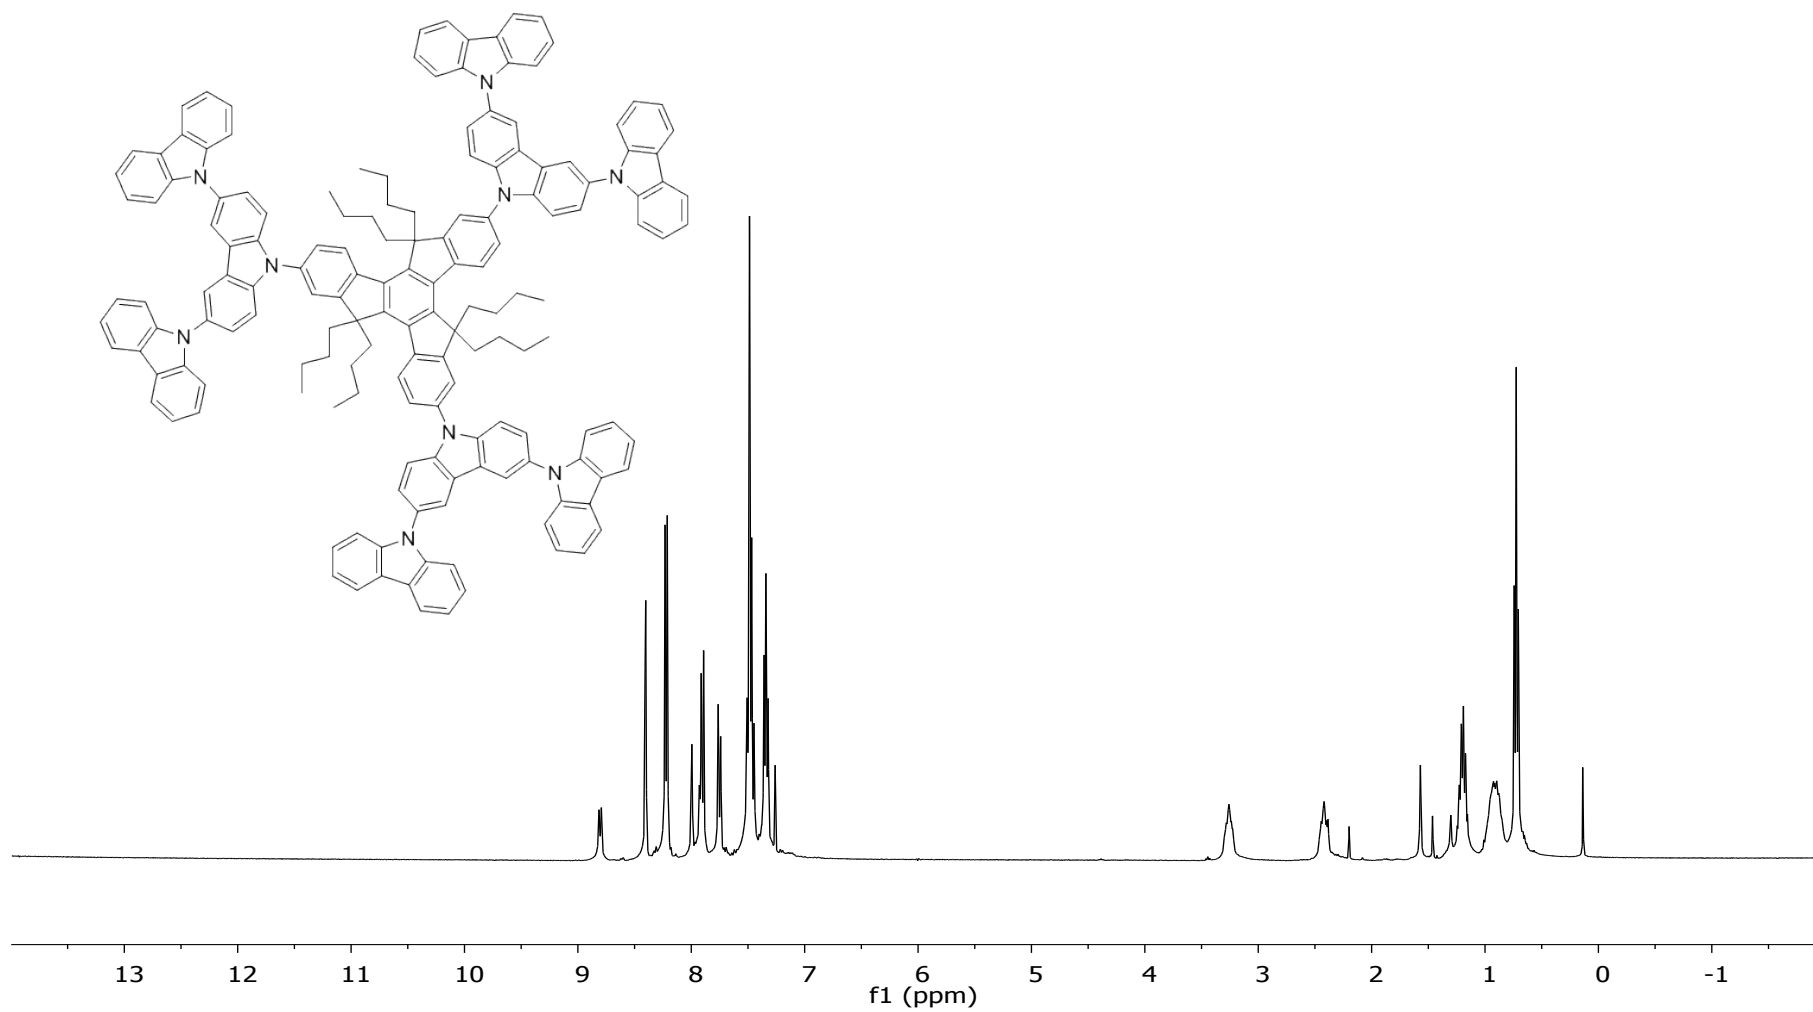

**Figure S3**  $^1\text{H-NMR}$  spectrum of **2** in  $\text{CDCl}_3$

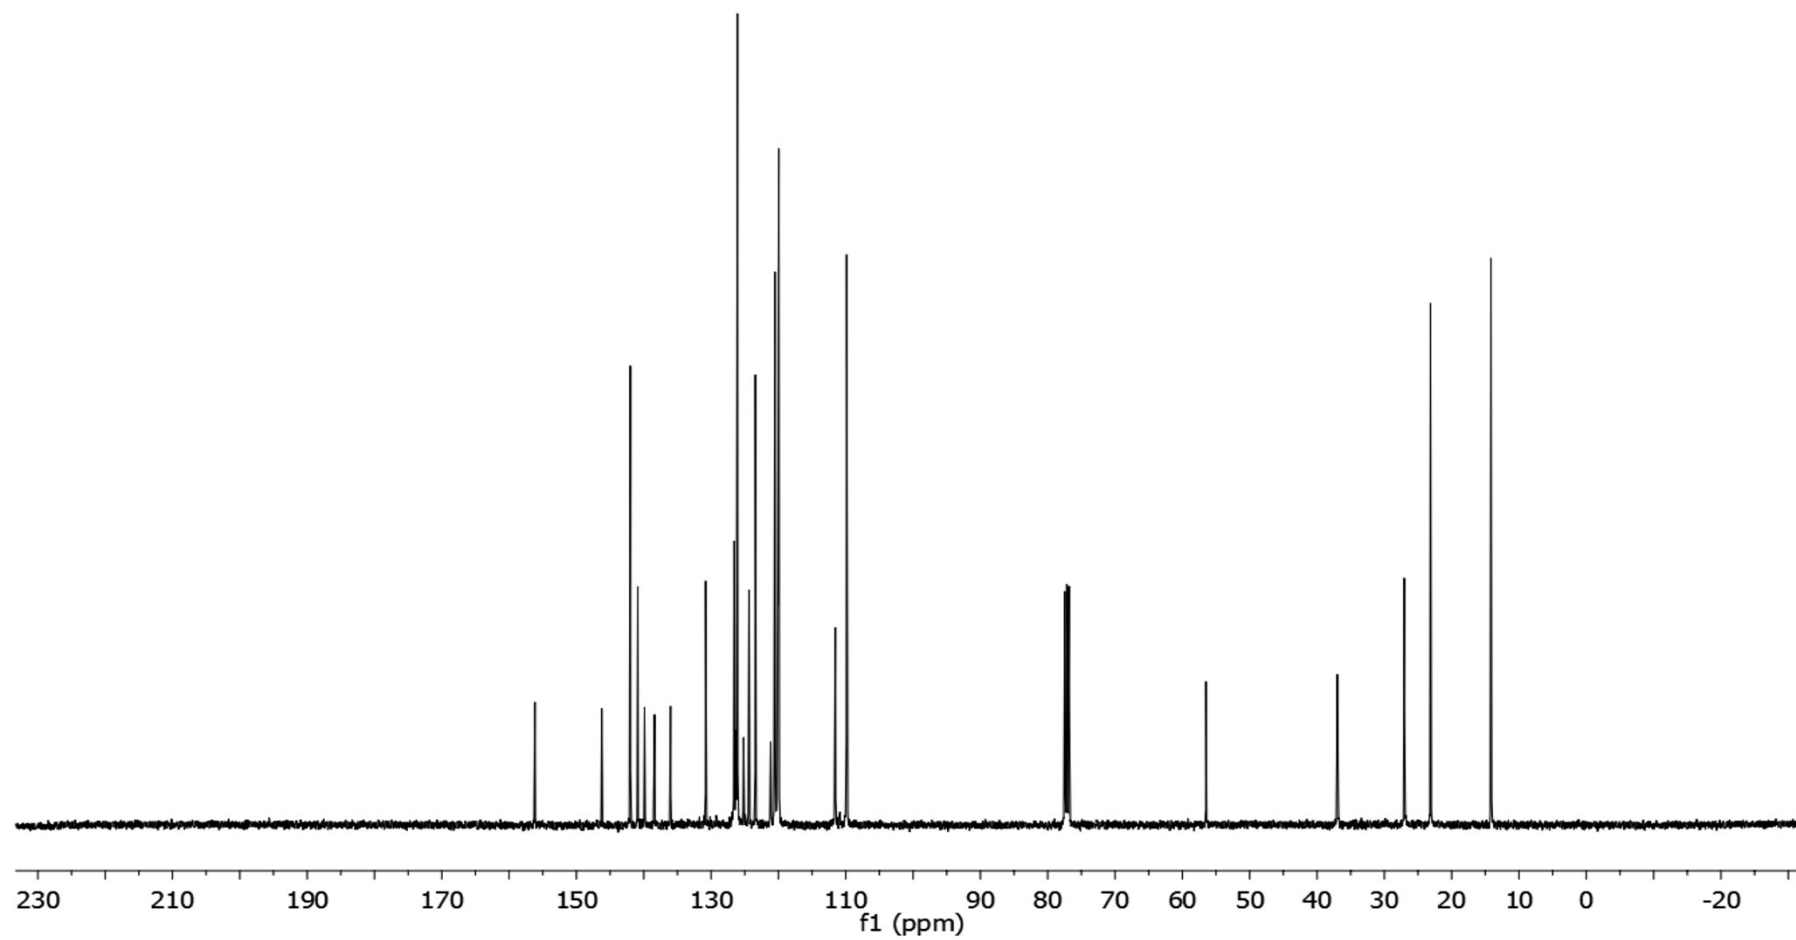

**Figure S4**  $^{13}\text{C}$ -NMR spectrum of **2** in  $\text{CDCl}_3$
